# Supplementary material for: Clinical efficacy and safety of drug interventions for primary and secondary prevention of osteoporotic fractures in postmenopausal women: Network meta-analysis followed by factor and cluster analysis
Source: PLOS journal article supplement (doi:10.1371/journal.pone.0234123), 2020-06-03

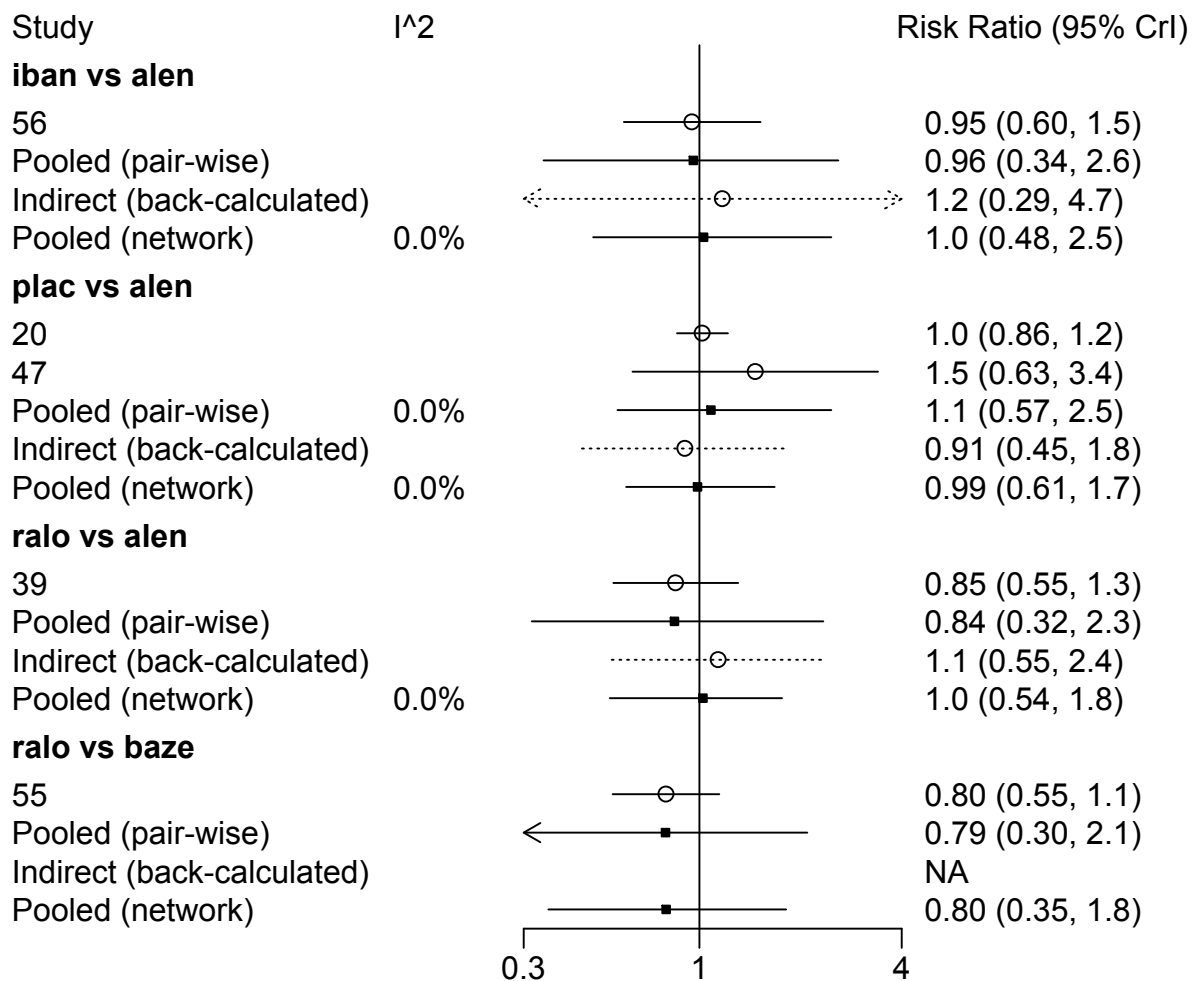

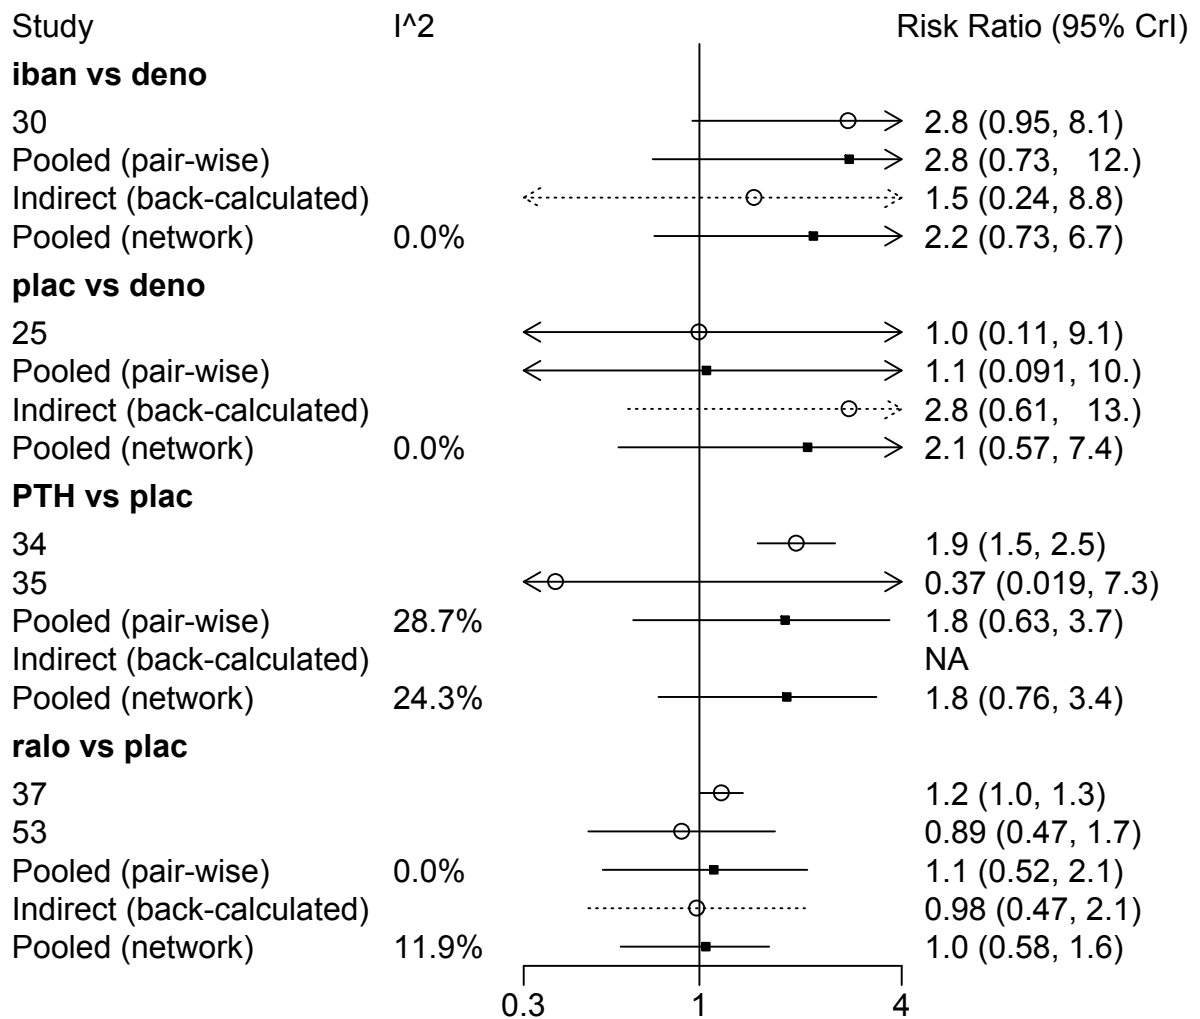

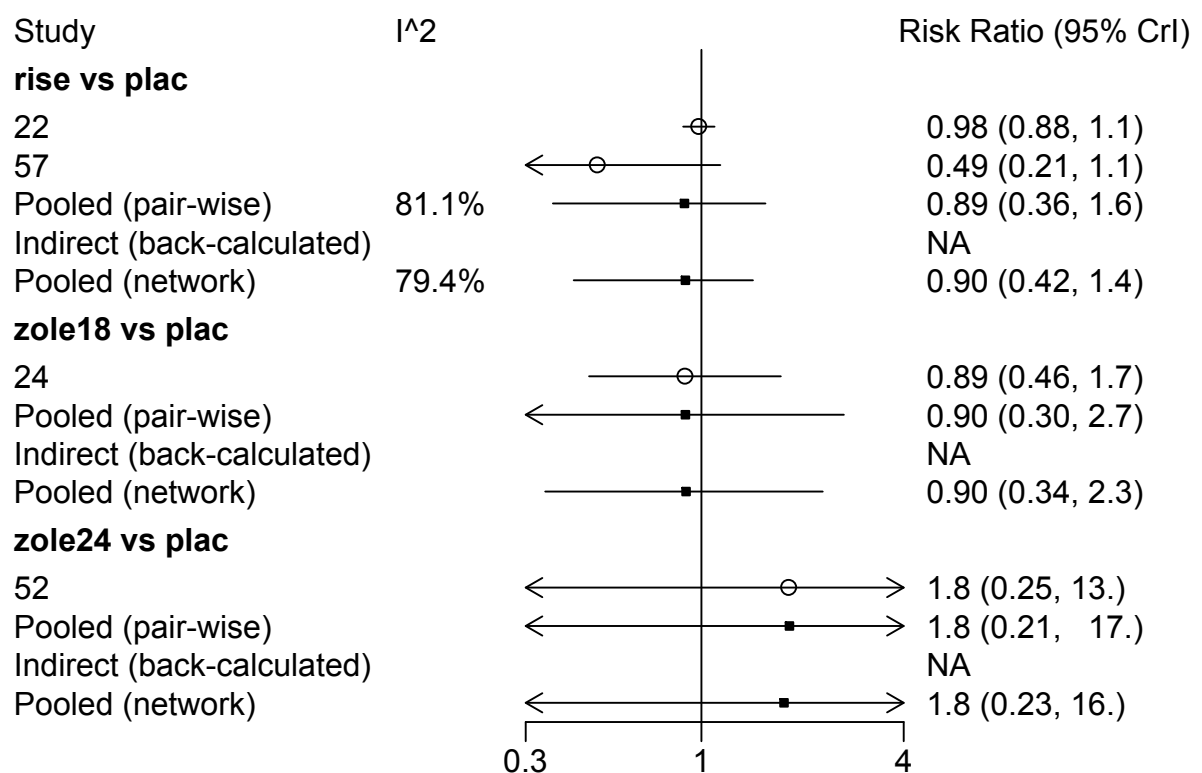

Supplement: S22 (10.1371/journal.pone.0234123.s022) [file journal.pone.0234123.s022]
